# Supplementary material for: Mitochondrial DNA variants of Podolian cattle breeds testify for a dual maternal origin
Source: PubMed Central journal article supplement (PMC5819780; doi:10.1371/journal.pone.0192567), 2018-02-20
Supplement: pone.0192567.s004.pdf [file pone.0192567.s004.pdf]

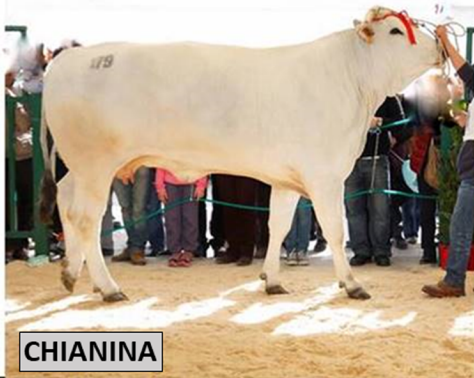

**CHIANINA**

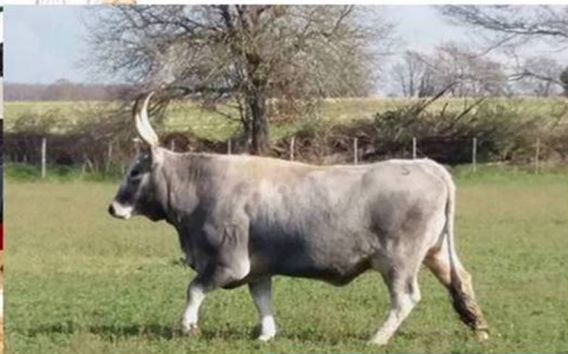

**MAREMMANA**

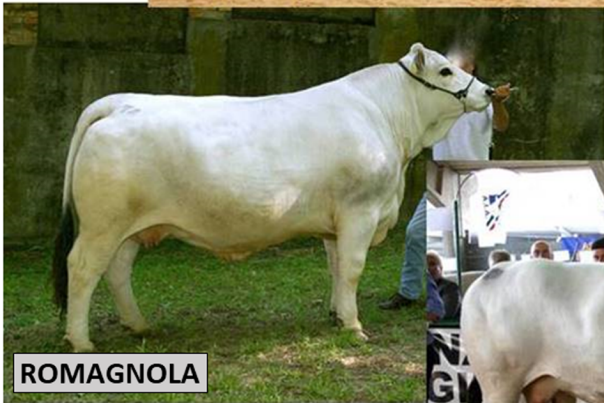

**ROMAGNOLA**

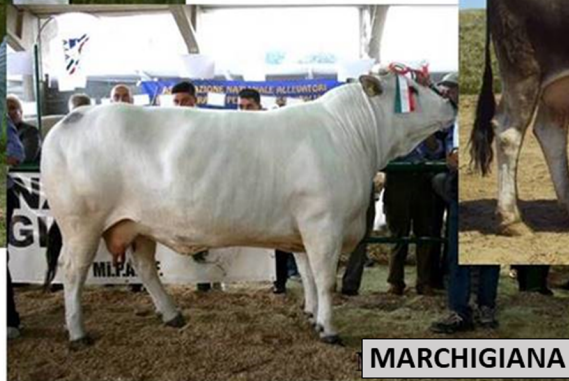

**MARCHIGIANA**

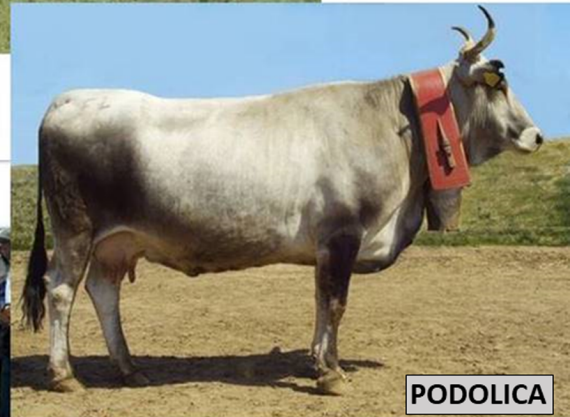

**PODOLICA**
