# Supplementary material for: Mitochondrial DNA variants of Podolian cattle breeds testify for a dual maternal origin
Source: PLoS One. 2018 Feb 20;13(2):e0192567. doi: 10.1371/journal.pone.0192567 (PMC5819780; doi:10.1371/journal.pone.0192567)
Supplement: S1 Table — (XLSX) [file pone.0192567.s001.xlsx]

## Sheet: S1 Table
S1 Table. List of Podolian breeds analyzed in this study.
Breed	Current Distribution	Breed Consistencya	Genealogical Records	Breed Classification (FAO)b
Bianca di Val Padana	Northern Italy	843	Herdbook	Endangered/maintained
Calvana	Central Italy	454	Herdbook	Critical/maintained
Chianina	Central Italy	43888	Herdbook	-
Podolica Italiana	Southern Italy	29825	Herdbook	-
Maremmana	Central Italy	10278	Herdbook	-
Marchigiana	Central Italy	51633	Herdbook	-
Mucco Pisano	Central Italy	467	Herdbook	Endangered/maintained
Romagnola	Central Italy	12532	Herdbook	-
Piemontese	Northern Italy	264177	Herdbook	-
Hungarian Grey	Hungary	10310	Herdbook	-
Bulgarian Grey	Bulgaria	2672	Herdbook	Endangered
Istrian Cattle	Croatia	1200/1400	Herdbook	Endangered/maintained
Katerini	Greece	766	Herdbook	Critical/maintained
Romanian Grey	Romania	200	Herdbook	Endangered/maintained
Slavonian Syrmian P	Croatia	300/350	Herdbook	Critical/maintained
Turkish Grey	Turkey	12400/20000	No Herdbook	-
Ukrainian Grey	Ukraine	908	Herdbook	Critical
Podolsko	Serbia	400/1000	Herdbook	Critical
a Breed consistency = number of individuals recorded on the DAD-IS website (http://dad.fao.org/).
b Entries marked with a dash (-) indicate that the population is not endangered (http://dad.fao.org/).
